# Supplementary material for: Digital Technology-and-Services-Driven Sustainable Transformation of Agriculture: Cases of China and the EU
Source: MDPI journal article supplement (doi:10.3390/agriculture12020297), 2022-02-18
Supplement: s1 [file s1]

Archive with 3 entries (3 files):
- Table S1 . Difference of governance style along information flow.pdf
- Table S2. Digital agriculture policies of China and the EU.pdf
- Table S3. The role of stakeholders in promoting sustainable transformation in agriculture in China and the EU.pdf
