# Supplementary material for: Digital Technology-and-Services-Driven Sustainable Transformation of Agriculture: Cases of China and the EU
Source: MDPI journal article supplement (doi:10.3390/agriculture12020297), 2022-02-18
Supplement: s1 [file s1 › Table S1 . Difference of governance style along information flow.pdf]

Table S1. Difference of governance style along information flow.

| Information flow | Hierarchical style                                                                                                                                                                                                                                                                                                                                                            | Network style                                                                                                                                                                                                                                                                                                                                                                                                       | Market style                                                                                                                                                                                                                                                                                                                |
|------------------|-------------------------------------------------------------------------------------------------------------------------------------------------------------------------------------------------------------------------------------------------------------------------------------------------------------------------------------------------------------------------------|---------------------------------------------------------------------------------------------------------------------------------------------------------------------------------------------------------------------------------------------------------------------------------------------------------------------------------------------------------------------------------------------------------------------|-----------------------------------------------------------------------------------------------------------------------------------------------------------------------------------------------------------------------------------------------------------------------------------------------------------------------------|
| Generation       | Environmental data: landscape configuration and composition; climate; production; water; biodiversity; soil<br>Social data: economic input and output; demographic structure; workforce; financial; policy                                                                                                                                                                    |                                                                                                                                                                                                                                                                                                                                                                                                                     |                                                                                                                                                                                                                                                                                                                             |
| Collection       | <ul style="list-style-type: none"> <li>● Top-down, government-imposed orders to oversee implementation.</li> </ul>                                                                                                                                                                                                                                                            | <ul style="list-style-type: none"> <li>● Government, market, and society participation in information collection.</li> </ul>                                                                                                                                                                                                                                                                                        | <ul style="list-style-type: none"> <li>● Market-led information collection.</li> </ul>                                                                                                                                                                                                                                      |
| Analysis         | <ul style="list-style-type: none"> <li>● The government relies on research institutions or partner companies to analyze data and lacks connectivity between different stakeholders to make the most of digital transformation opportunities in agriculture.</li> </ul>                                                                                                        | <ul style="list-style-type: none"> <li>● Different stakeholders use the web-based information platform to analyze data and information according to their own demands. Different stakeholders need to be involved and use the information platform.</li> </ul>                                                                                                                                                      | <ul style="list-style-type: none"> <li>● The marketplace is profit-oriented, analyzing data and identifying potential technology needs based on the needs of different stakeholders, making it difficult to fully consider the expectations of different stakeholders for digital transformation in agriculture.</li> </ul> |
| Application      | <ul style="list-style-type: none"> <li>● Develop a top-level design for agricultural development.</li> <li>● Promote new technologies and guide the application of digital technology services in the sustainable transformation of agriculture.</li> <li>● Government departments need to strengthen the regulation of the market to ensure information security.</li> </ul> | <ul style="list-style-type: none"> <li>● Meeting the needs of different stakeholders (farmers: simplifying production processes and improving agricultural safety; media: transmitting agricultural information; market: providing technology or platforms for profit; research institutions: realizing the combination of industry, academia, and research; government: ensuring information security).</li> </ul> | <ul style="list-style-type: none"> <li>● Demand-driven, market-based technology and information for other stakeholders.</li> </ul>                                                                                                                                                                                          |
| Impact           | <ul style="list-style-type: none"> <li>● Can promote the important role of digital technologies in sustainable agricultural development, but it is difficult to directly mobilize the participation of different stakeholders.</li> </ul>                                                                                                                                     | <ul style="list-style-type: none"> <li>● Grid-based governance can mobilize the participation of different stakeholders in the process of digital transformation of agriculture and promote digital transformation of agriculture.</li> </ul>                                                                                                                                                                       | <ul style="list-style-type: none"> <li>● Market-led can provide diversified IT services, but is prone to homogenization. Information barriers exist within market players or with other stakeholders.</li> </ul>                                                                                                            |
