# Supplementary material for: Digital Technology-and-Services-Driven Sustainable Transformation of Agriculture: Cases of China and the EU
Source: MDPI journal article supplement (doi:10.3390/agriculture12020297), 2022-02-18
Supplement: s1 [file s1 › Table S2. Digital agriculture policies of China and the EU.pdf]

**Table S2.** Digital agriculture policies of China and the EU.

| China                    |                                                                                                                                            |                                                                                                        |                                                                             | EU                                                       |                                                                                 |                                                                           |
|--------------------------|--------------------------------------------------------------------------------------------------------------------------------------------|--------------------------------------------------------------------------------------------------------|-----------------------------------------------------------------------------|----------------------------------------------------------|---------------------------------------------------------------------------------|---------------------------------------------------------------------------|
| Competent authorities    | General office of the state council, national development and reform commission, ministry of agriculture of the people's republic of China |                                                                                                        |                                                                             | European Commission, Directorate-General for Agriculture |                                                                                 |                                                                           |
| Policy start-up stage    | 2015                                                                                                                                       | Guiding Opinions on Actively Promoting the "Internet Plus" Action Plan                                 | "Internet Plus" modern agriculture                                          | 1992                                                     | McSharry reform of the common agricultural policy                               | Create a database                                                         |
|                          | 2015                                                                                                                                       | Notice on Issuing the action platform for promoting the development of big data                        | Big data for agriculture and rural areas                                    | 2003                                                     | The Mid Term Review of the Common Agricultural Policy                           | Establishing a national advisory service system                           |
|                          | 2016                                                                                                                                       | Outline of National Informatization Development Strategy                                               | Promote the application of information technology and intelligent equipment | 2008                                                     | Reform of the European Union's Common Agricultural Policy                       | Enhancing the effectiveness of measures in the Mid-term review            |
| Policy development stage | 2017                                                                                                                                       | Opinions on the implementation of promoting the development of big data in agriculture and rural areas | Clarified five basic tasks and eleven key areas                             | 2014                                                     | Horizon 2020                                                                    | Achieve smart, sustainable, and inclusive agricultural growth             |
|                          | 2017                                                                                                                                       | Promote the Development of the New Generation Artificial Intelligence Industry                         | Smart agriculture                                                           | 2017                                                     | The Future of Food and Farming                                                  | Using modern technology to support local farmers                          |
|                          | 2019                                                                                                                                       | Outline of digital village development strategy                                                        | Digital Rural Development Plan                                              | 2019                                                     | A smart and sustainable digital future for European agriculture and rural areas | Promoting digital technologies in sustainable agricultural transformation |
