# Supplementary material for: Digital Technology-and-Services-Driven Sustainable Transformation of Agriculture: Cases of China and the EU
Source: MDPI journal article supplement (doi:10.3390/agriculture12020297), 2022-02-18
Supplement: s1 [file s1 › Table S3. The role of stakeholders in promoting sustainable transformation in agriculture in China and the EU.pdf]

**Table S3.** The role of stakeholders in promoting sustainable transformation in agriculture in China and the EU.

| Stakeholder |                                  | China                                                                                                                                                                                                                                                                                                            | EU                                                                                                                                                                                                                                                                                                        |
|-------------|----------------------------------|------------------------------------------------------------------------------------------------------------------------------------------------------------------------------------------------------------------------------------------------------------------------------------------------------------------|-----------------------------------------------------------------------------------------------------------------------------------------------------------------------------------------------------------------------------------------------------------------------------------------------------------|
| Government  | Central government               | <ul style="list-style-type: none"> <li>● Design and formulation of development routes and targets</li> <li>● Reconciling regional development imbalances</li> <li>● Monitoring the implementation of local government policies</li> </ul>                                                                        | <ul style="list-style-type: none"> <li>● Consultation mechanisms and cross-compliance</li> <li>● Aligning national interests</li> <li>● Monitoring national implementation</li> </ul>                                                                                                                     |
|             |                                  | <ul style="list-style-type: none"> <li>● Implementing central government policies</li> </ul>                                                                                                                                                                                                                     | <ul style="list-style-type: none"> <li>● Policy implementation</li> </ul>                                                                                                                                                                                                                                 |
|             | Local government                 | <ul style="list-style-type: none"> <li>● Promoting effective links between the various actors in the region</li> <li>● Monitoring of the legal production of the various actors</li> </ul>                                                                                                                       | <ul style="list-style-type: none"> <li>● Over-disaggregation of responsibilities and inefficiencies due to the complexity and heterogeneity of countries</li> </ul>                                                                                                                                       |
|             |                                  |                                                                                                                                                                                                                                                                                                                  |                                                                                                                                                                                                                                                                                                           |
| Market      | Service companies                | <ul style="list-style-type: none"> <li>● Promoting the transformation of digital technology services into market-led agricultural production services</li> <li>● Training for farmers in digital technology diffusion</li> <li>● Play an analytical and influential role for agricultural information</li> </ul> | <ul style="list-style-type: none"> <li>● Digital technology outreach training for farmers</li> <li>● Increased agricultural versatility</li> <li>● Promotes the development of productive agricultural services</li> </ul>                                                                                |
|             |                                  |                                                                                                                                                                                                                                                                                                                  |                                                                                                                                                                                                                                                                                                           |
|             |                                  |                                                                                                                                                                                                                                                                                                                  |                                                                                                                                                                                                                                                                                                           |
|             | Technology companies             | <ul style="list-style-type: none"> <li>● Promote the development and use of agricultural information resources</li> <li>● Improve the process of agricultural digital industrialization</li> </ul>                                                                                                               | <ul style="list-style-type: none"> <li>● Reduces the cost of access to agricultural information</li> <li>● Promotes the development and use of agricultural information resources</li> <li>● Improves production efficiency and protects the environment</li> </ul>                                       |
| Society     | Scientific research institutions | <ul style="list-style-type: none"> <li>● Providing technical and data support for digital technology services</li> <li>● Developing new technologies to drive digital transformation in agriculture</li> </ul>                                                                                                   | <ul style="list-style-type: none"> <li>● Technical and data support for digital technology services</li> <li>● Highly segmented to provide commercial services to different actors</li> </ul>                                                                                                             |
|             |                                  |                                                                                                                                                                                                                                                                                                                  |                                                                                                                                                                                                                                                                                                           |
|             | Social organizations             | <ul style="list-style-type: none"> <li>● Raising the issue of public services in rural China</li> <li>● Presenting gaps in China's social management legislation</li> <li>● Raising public awareness of the digital transformation of agriculture</li> </ul>                                                     | <ul style="list-style-type: none"> <li>● Support for the sustainable transformation of agriculture for each subject</li> <li>● Providing data technology advice and services</li> <li>● Promote the latest research findings on sustainable agriculture</li> <li>● Promote policy implications</li> </ul> |
|             |                                  |                                                                                                                                                                                                                                                                                                                  |                                                                                                                                                                                                                                                                                                           |

|                        |                                                                                                                                                                                                                                                                         |                                                                                                                                                                                                                                                                      |
|------------------------|-------------------------------------------------------------------------------------------------------------------------------------------------------------------------------------------------------------------------------------------------------------------------|----------------------------------------------------------------------------------------------------------------------------------------------------------------------------------------------------------------------------------------------------------------------|
| Farmers                | <ul style="list-style-type: none"> <li>● Optimizing planting patterns</li> <li>● Improving production efficiency</li> <li>● Improving food safety</li> <li>● Promote sustainable transformation of agriculture</li> <li>● Breaking down information barriers</li> </ul> | <ul style="list-style-type: none"> <li>● Proactive technical advice</li> <li>● Optimize planting patterns</li> <li>● Improving production efficiency</li> <li>● Promote sustainable transformation of agriculture</li> </ul>                                         |
| Farmers' organizations | <ul style="list-style-type: none"> <li>● Play the role of the last mile off agricultural extension</li> <li>● Promote the professionalization of farmers</li> <li>● Reducing information asymmetry</li> </ul>                                                           | <ul style="list-style-type: none"> <li>● Improve farmers' technological management</li> <li>● Enhance farmers' capacity for innovation, democratic awareness and cooperation</li> <li>● Facilitate communication and cooperation between different actors</li> </ul> |
| Media                  | <ul style="list-style-type: none"> <li>● New media brings changes to agricultural information dissemination</li> <li>● Promoting agricultural economic development</li> </ul>                                                                                           | <ul style="list-style-type: none"> <li>● Focus on information disclosure</li> <li>● Promoting information transparency</li> <li>● Communicating emotional and ethical standards</li> </ul>                                                                           |
